# Supplementary material for: Role of Double-Strand Break End-Tethering during Gene Conversion in Saccharomyces cerevisiae
Source: PubMed Central journal article supplement (PMC4830573; doi:10.1371/journal.pgen.1005976), 2016-04-13

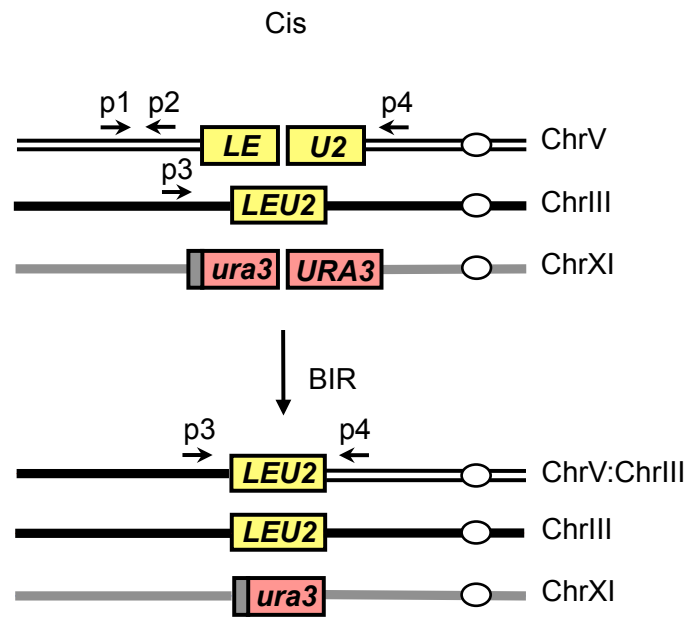

Supplement: pgen.1005976.s002.pdf [file pgen.1005976.s002.pdf]
