# Supplementary material for: Role of Double-Strand Break End-Tethering during Gene Conversion in Saccharomyces cerevisiae
Source: PubMed Central journal article supplement (PMC4830573; doi:10.1371/journal.pgen.1005976), 2016-04-13
Supplement: pgen.1005976.s004.pdf [file pgen.1005976.s004.pdf]

*LEU2* repair

|               |                                                    |
|---------------|----------------------------------------------------|
| Cis           | TGAGAATGCGAAATGGCGTGG<br>GAAAGAAGAGTGGTTGCGAACAGAG |
| Trans         | AGCCAGTACAACAGCAACAG<br>GAAAGAAGAGTGGTTGCGAACAGAG  |
| Rev-<br>Cis   | AGTATTGTTTGTGCACTTGCCT<br>TAGCGGGTTGTAATATCAGCAG   |
| Rev-<br>Trans | TGAGAATGCGAAATGGCGTGG<br>TAGCGGGTTGTAATATCAGCAG    |

*URA3* repair (SSA)

|               |                                                           |
|---------------|-----------------------------------------------------------|
| Cis           | TGTGAATGCTGGTCGCTATACT<br>GGAGCAAGAGTCATGTTTACTCTATAATAGG |
| Trans         | TGTGAATGCTGGTCGCTATACT<br>GGAGCAAGAGTCATGTTTACTCTATAATAGG |
| Rev-<br>Cis   | TGAGAATGCGAAATGGCGTGG<br>CGAGGAAGACGATAAGGTTAAGATAAG      |
| Rev-<br>Trans | TGTGAATGCTGGTCGCTATACT<br>GAGTGGTTGCGAACAGAGTAAA          |

Reference locus (*SLX4*)

|                |                                                  |
|----------------|--------------------------------------------------|
| All<br>strains | GAGGGTGGTGTGATCTTTAACC<br>ACGATCGAACAGCTTTGAATGA |
|----------------|--------------------------------------------------|
