# Supplementary material for: Role of Double-Strand Break End-Tethering during Gene Conversion in Saccharomyces cerevisiae
Source: PubMed Central journal article supplement (PMC4830573; doi:10.1371/journal.pgen.1005976), 2016-04-13
Supplement: pgen.1005976.s005.pdf [file pgen.1005976.s005.pdf]

|    |                           |
|----|---------------------------|
| p1 | TCGGGTGTGTATTGGTTCCATTCA  |
| p2 | TGAATGTAAATGGAGAACCGTACGC |
| p3 | GGGAAGGTGGGACAAAACATCAT   |
| p4 | GAAAGAAGAGTGGTTGCGAACAGAG |
